# Supplementary material for: Evolution of pollination by frugivorous birds in Neotropical Myrtaceae
Source: PeerJ journal article supplement (doi:10.7717/peerj.5426), 2018-08-27

Char. 0: branching degree of the paracladium

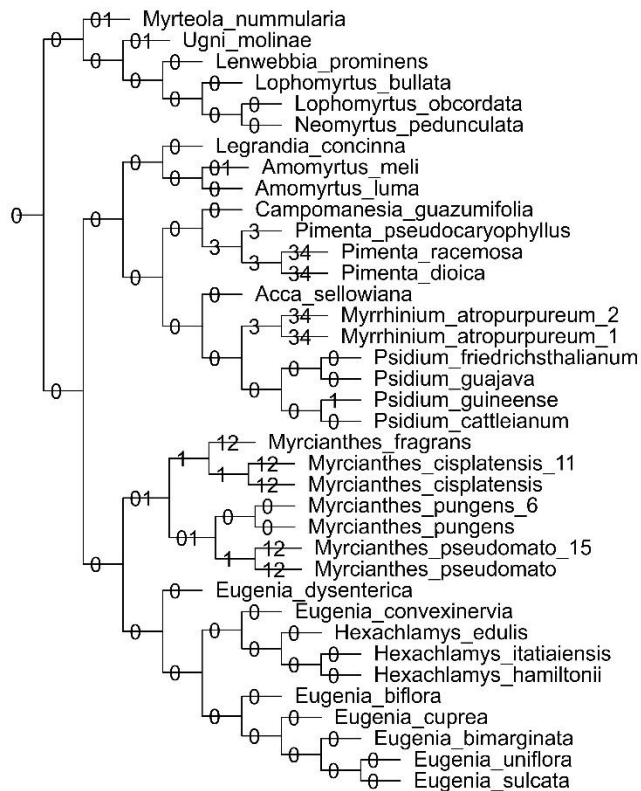

Char. 1: development of apical meristem of paracladium

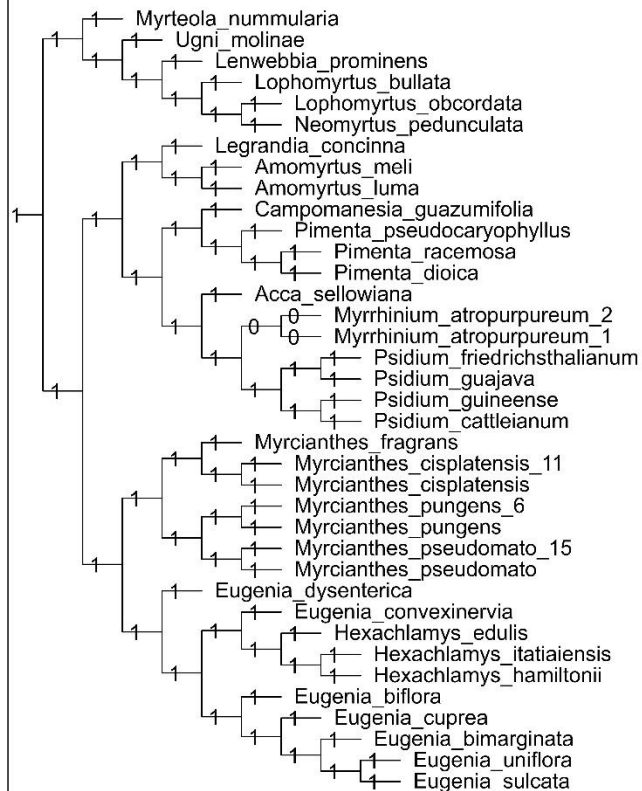

Char. 2: number of first order branching within the paracladium

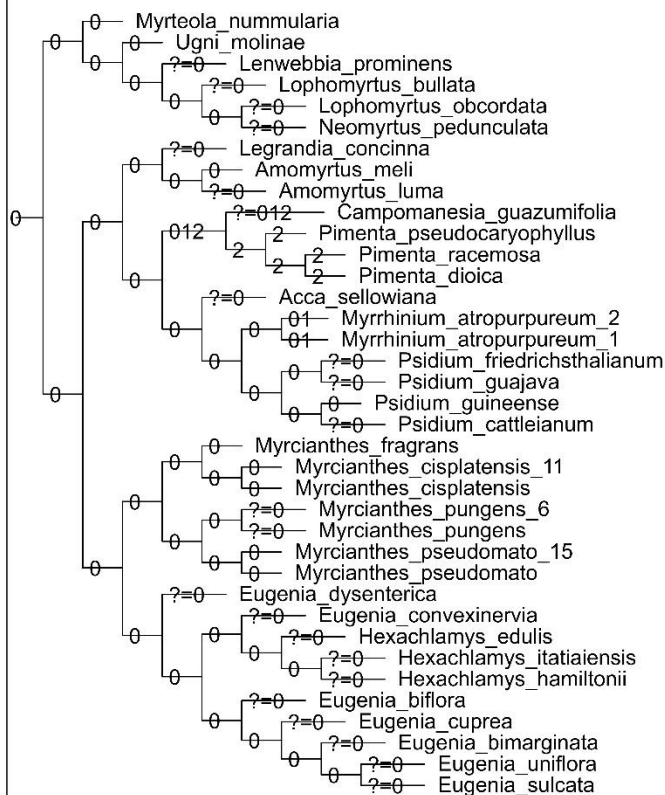

Char. 3: complexity of the first order branches within the paracladium

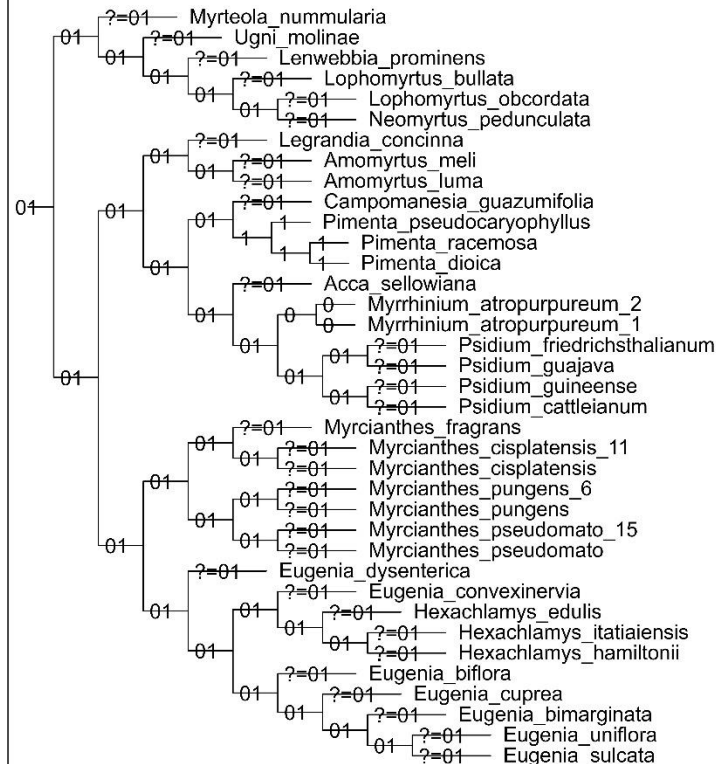

Char. 4: elongation of internodes of the floriferous branches

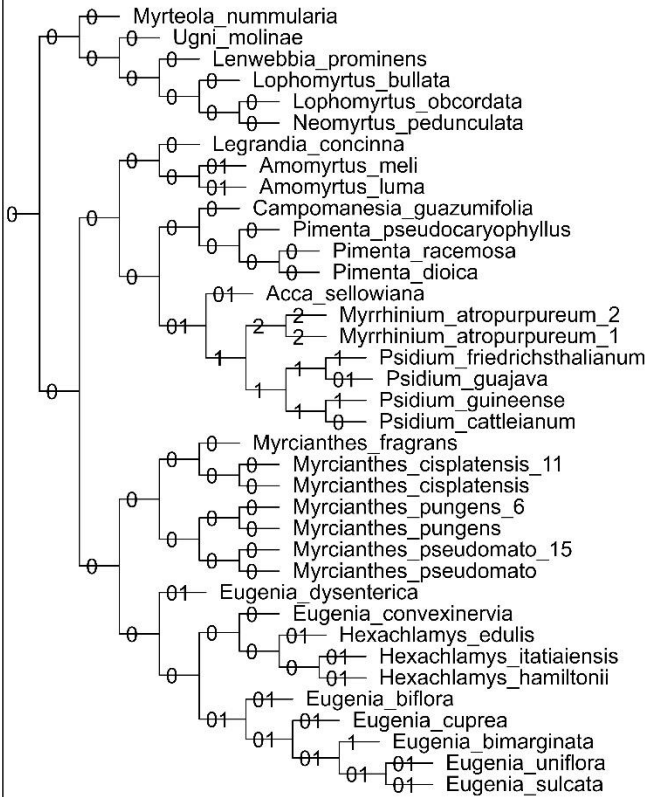

Char 5: type of foliage supporting the paracladio)

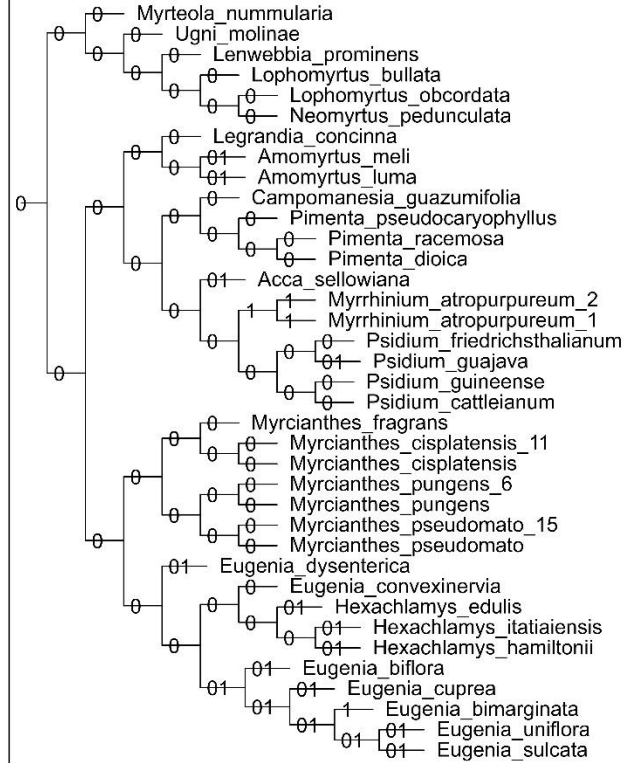

Char. 6: fleshy petal presence

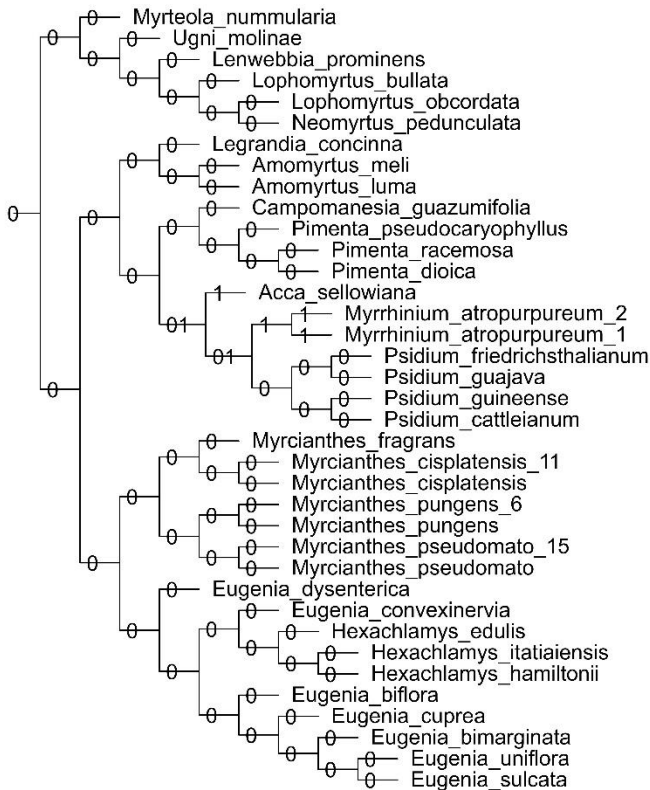

Char. 7: numbers of petals

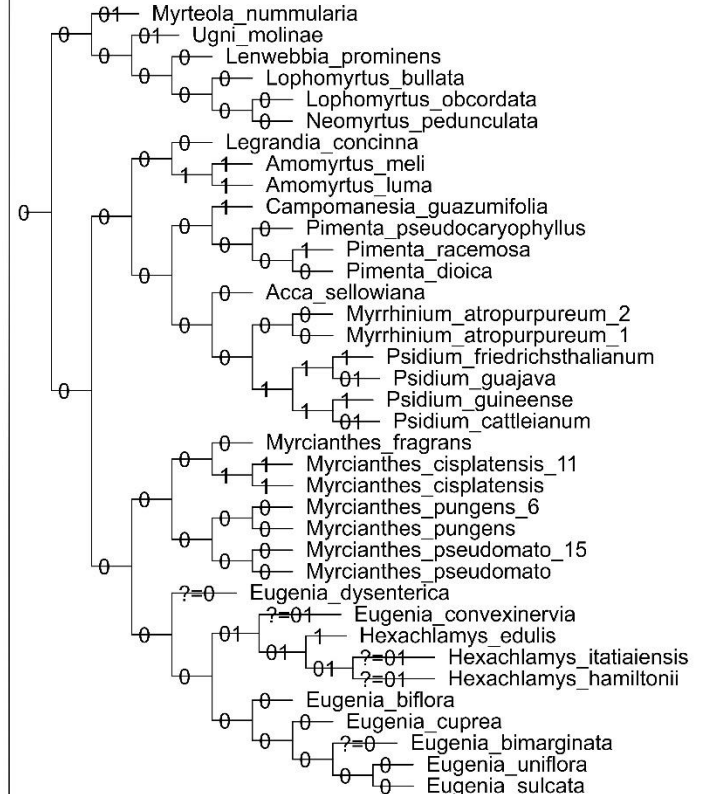

Char. 8: length of petals

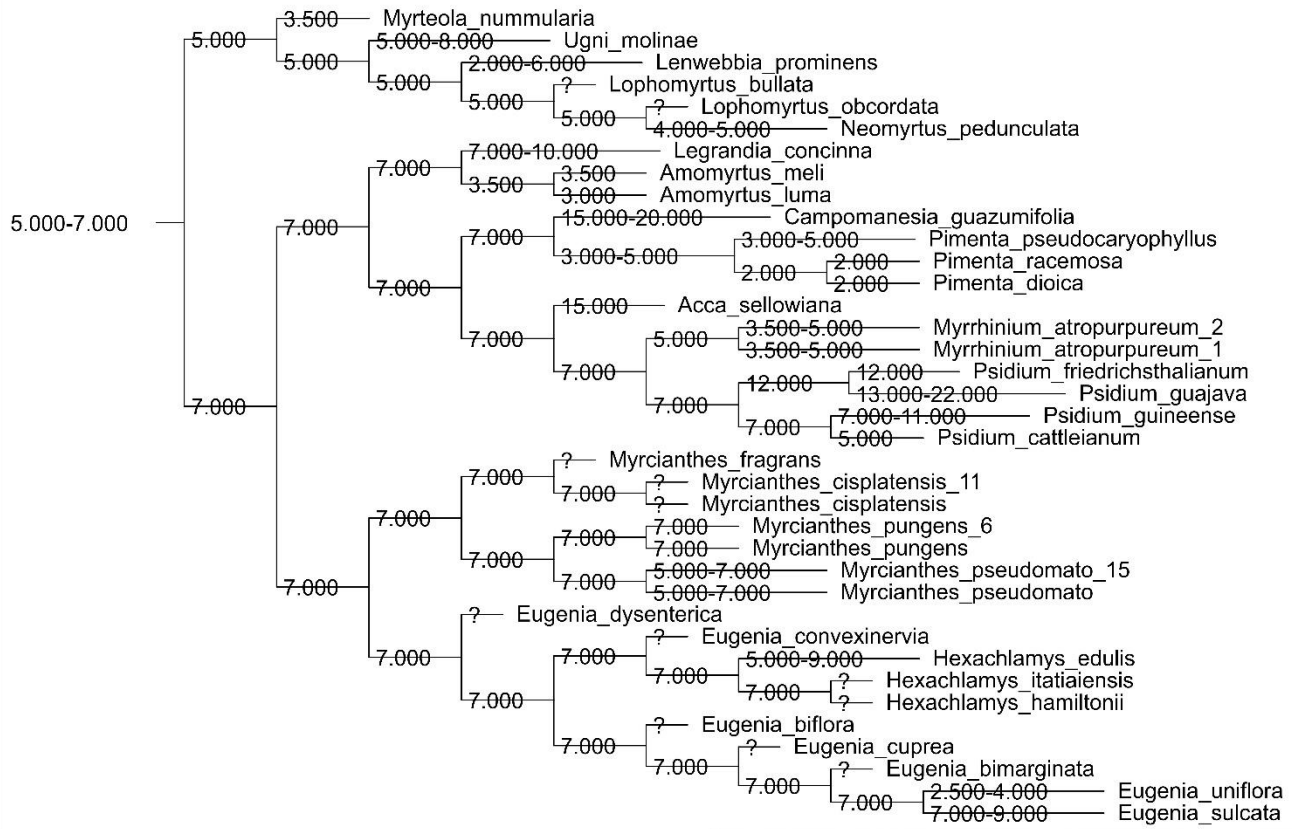

Char. 9: presence of pigments in petals

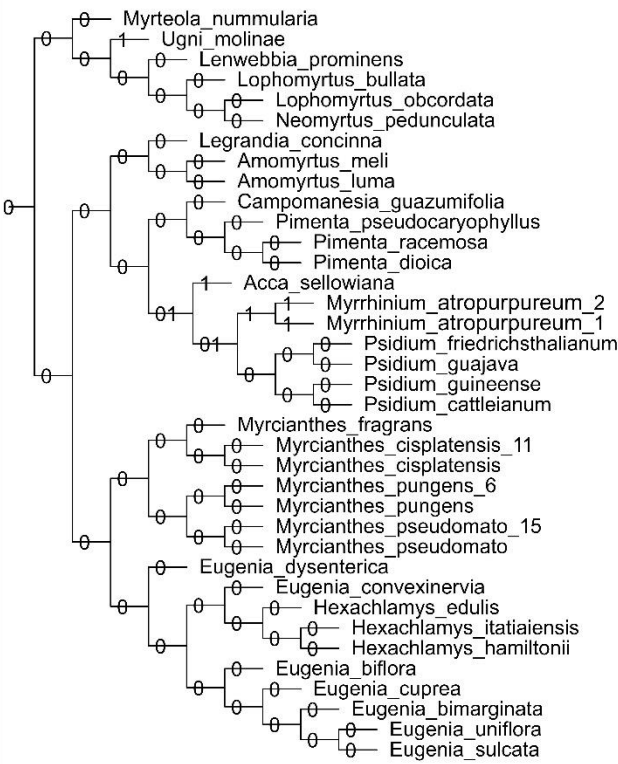

Char. 10: number of stamens

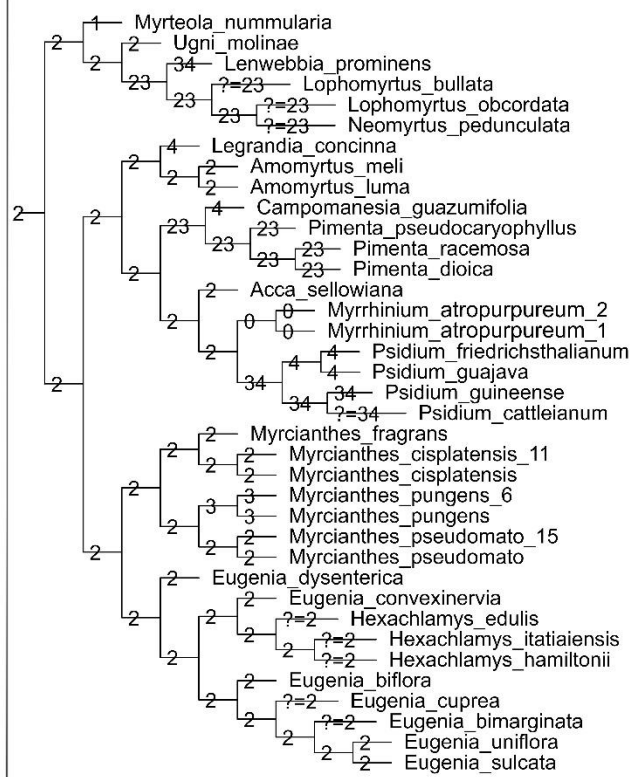

Char. 11: length of stamens

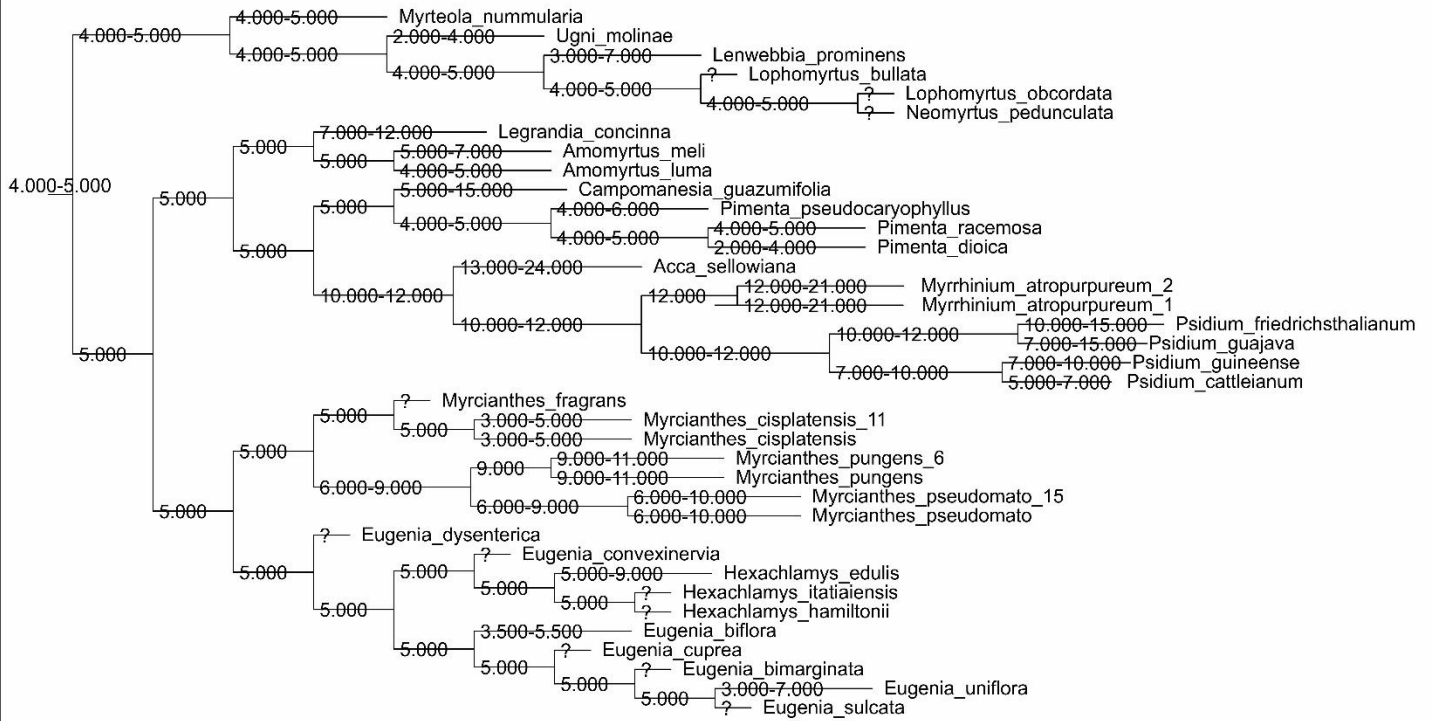

Char. 12: presence of purpureous pigments in filaments

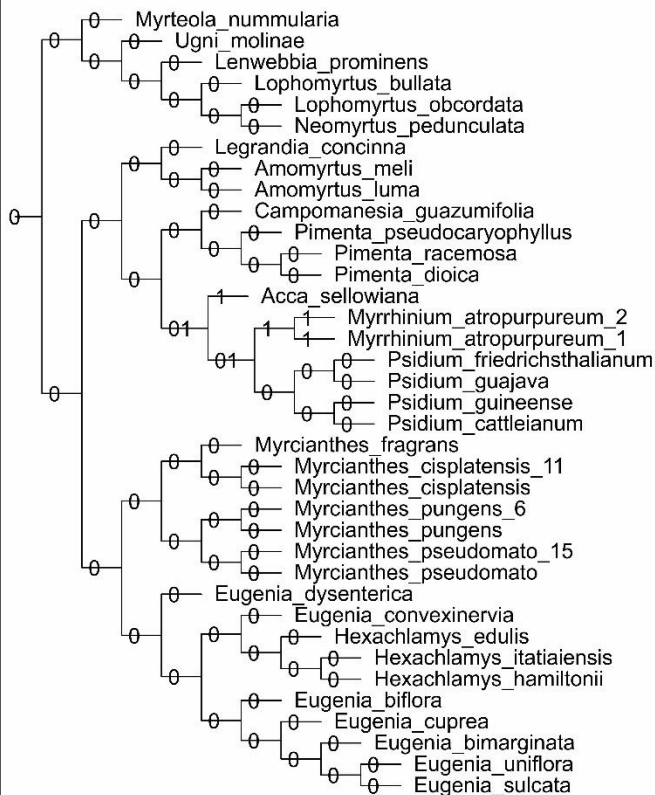

Char. 13: Main pollination type

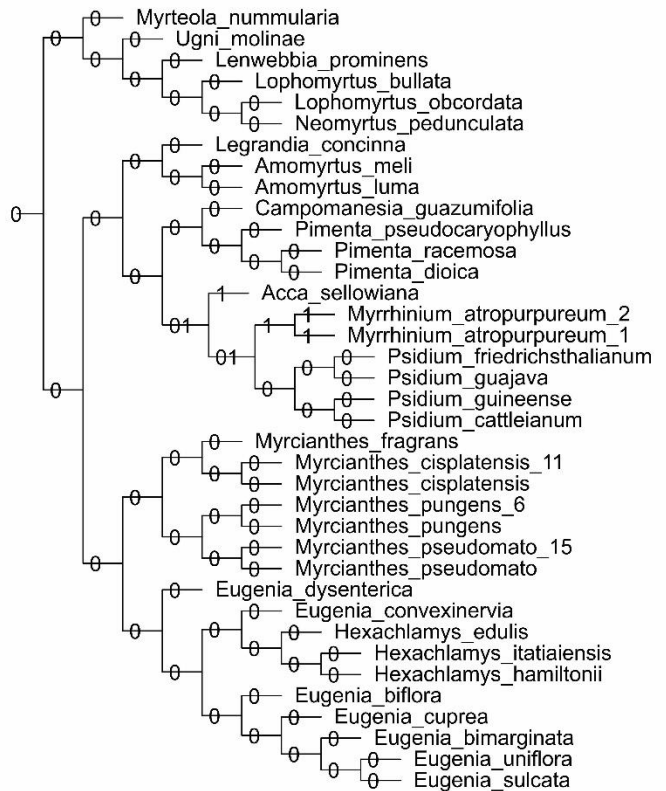

Supplement: Supplemental_(fig)_S3.pdf [file Supplemental_%28fig%29_S3.pdf]
