# Supplementary material for: Evolution of pollination by frugivorous birds in Neotropical Myrtaceae
Source: PeerJ journal article supplement (doi:10.7717/peerj.5426), 2018-08-27
Supplement: Supplemental_(Fig)_1.pdf [file Supplemental_%28Fig%29_1.pdf]

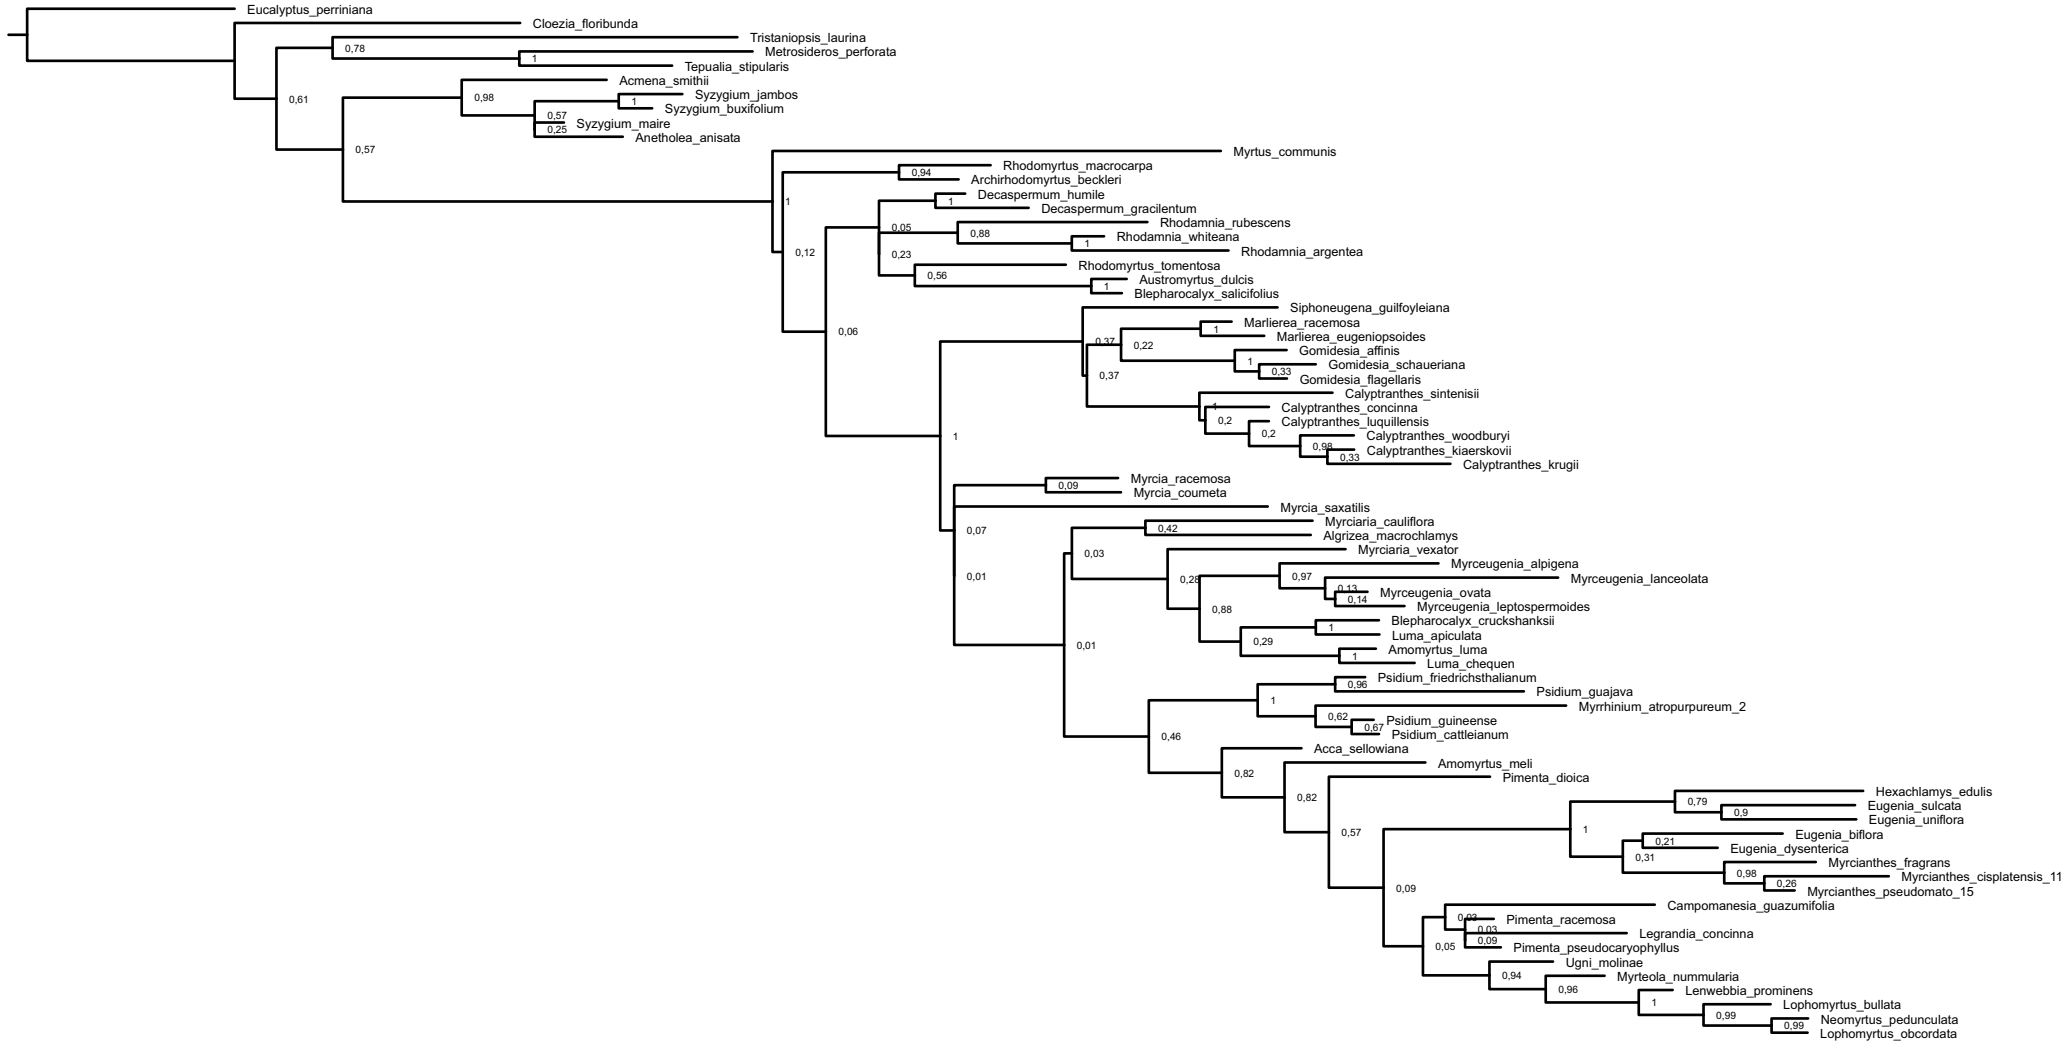

0.009

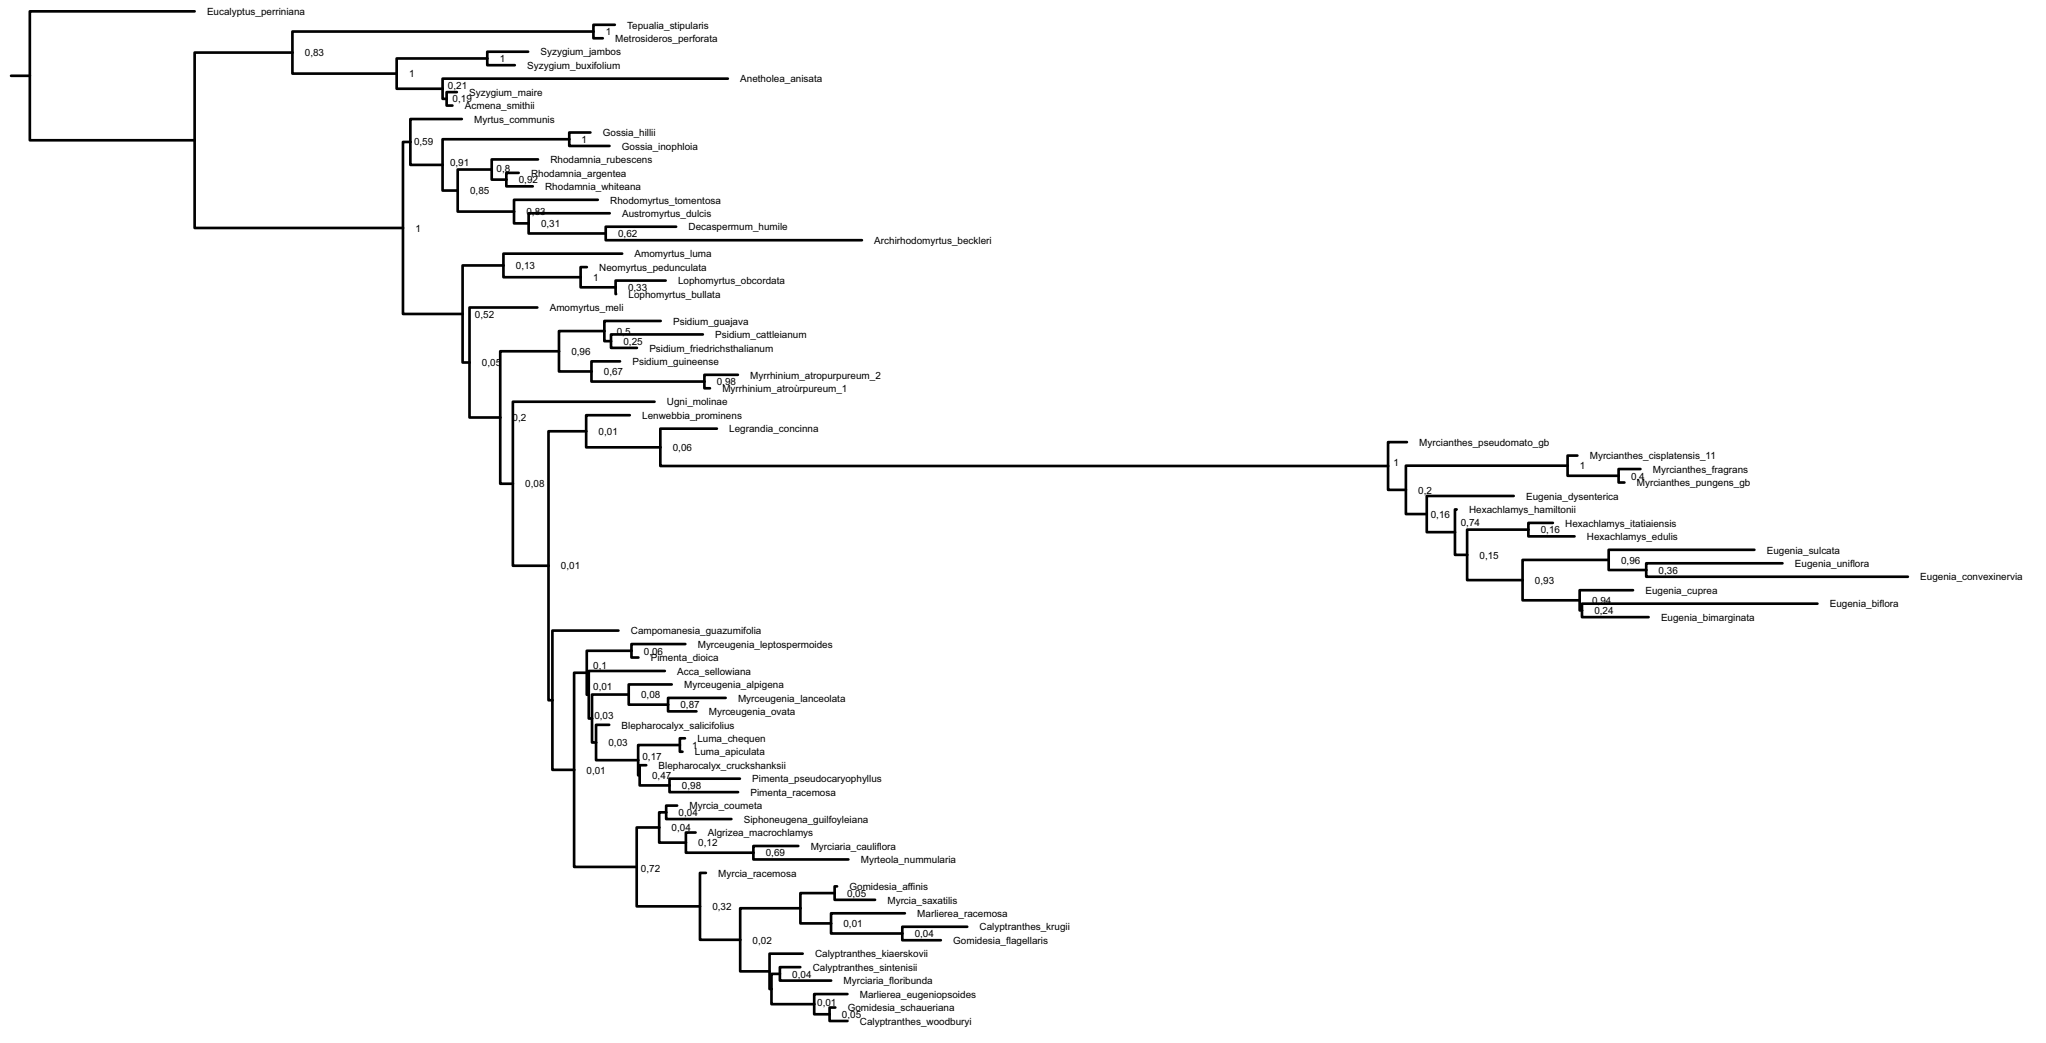

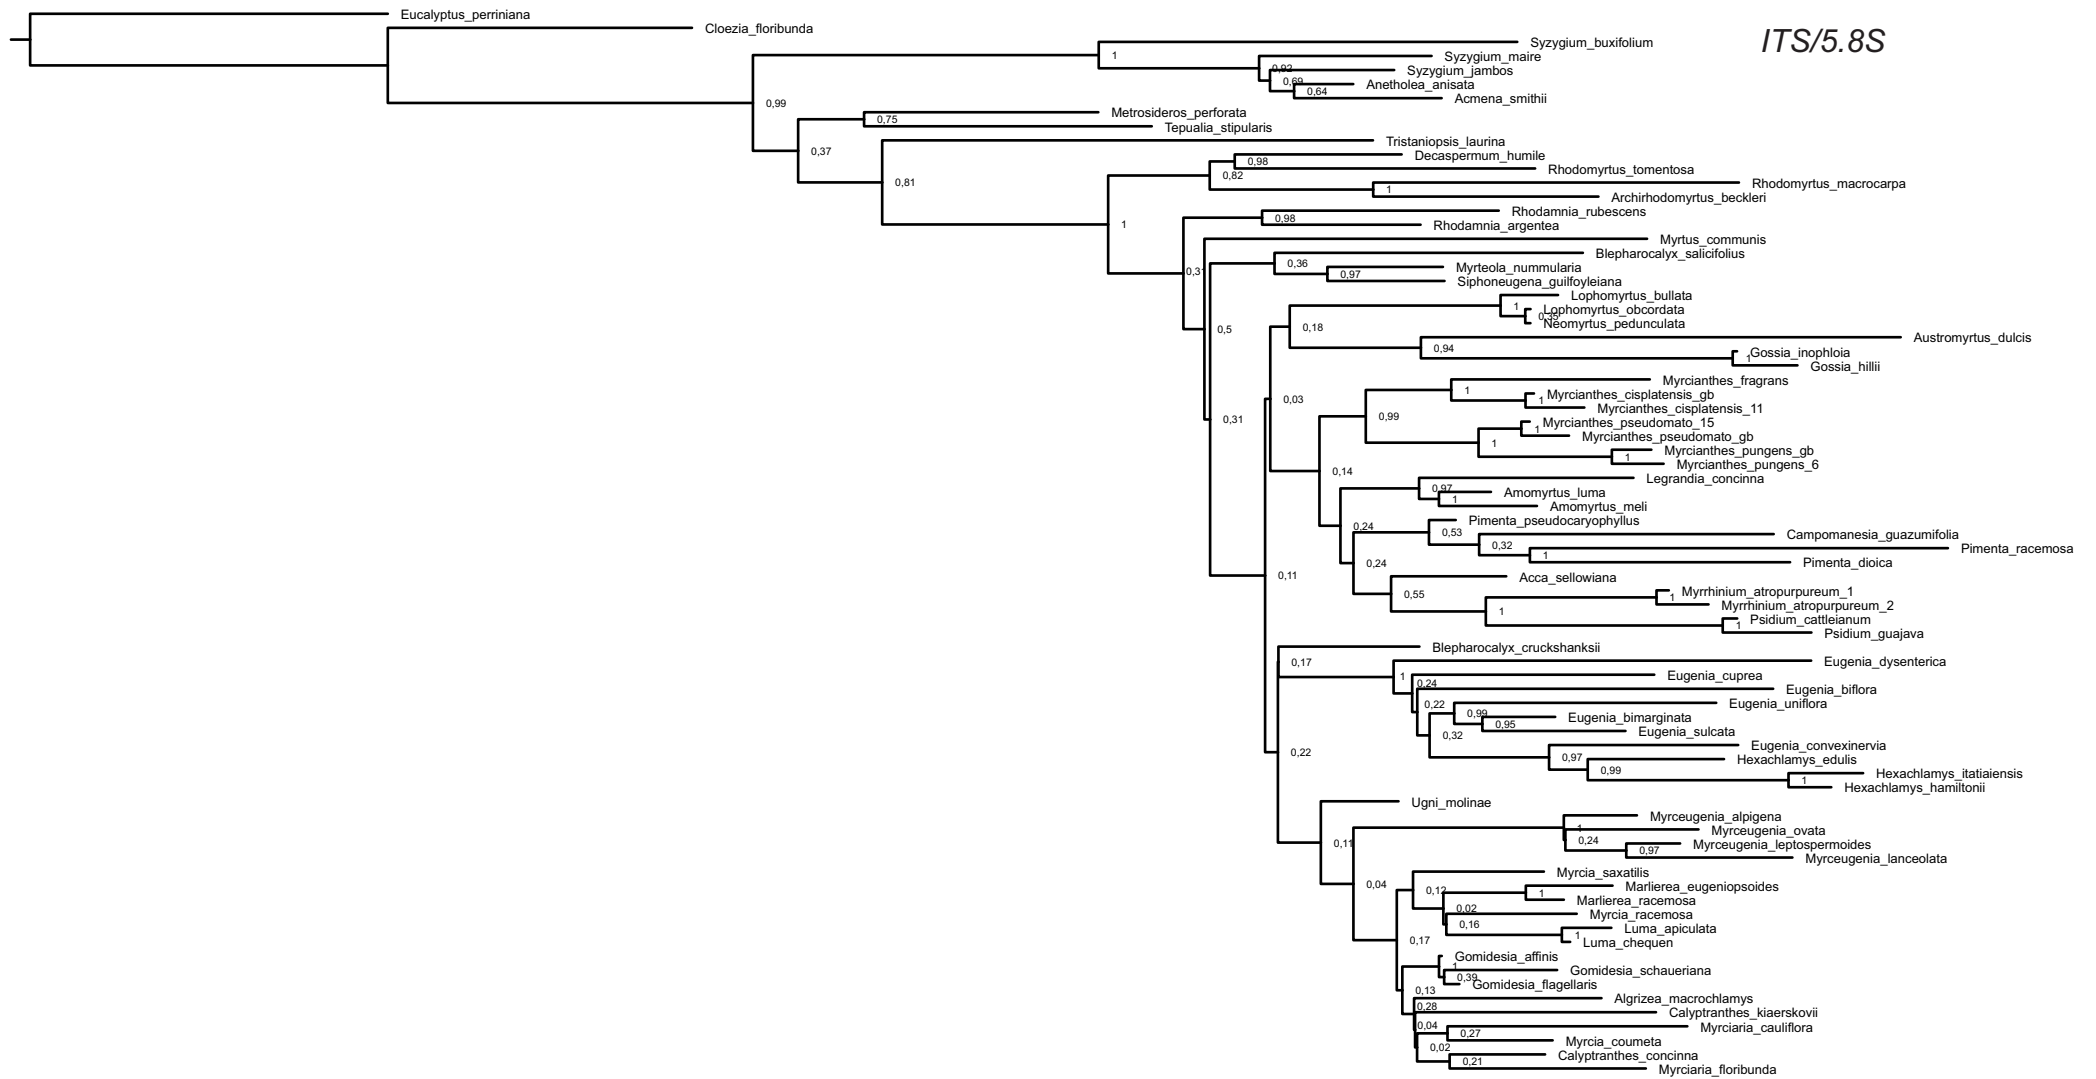

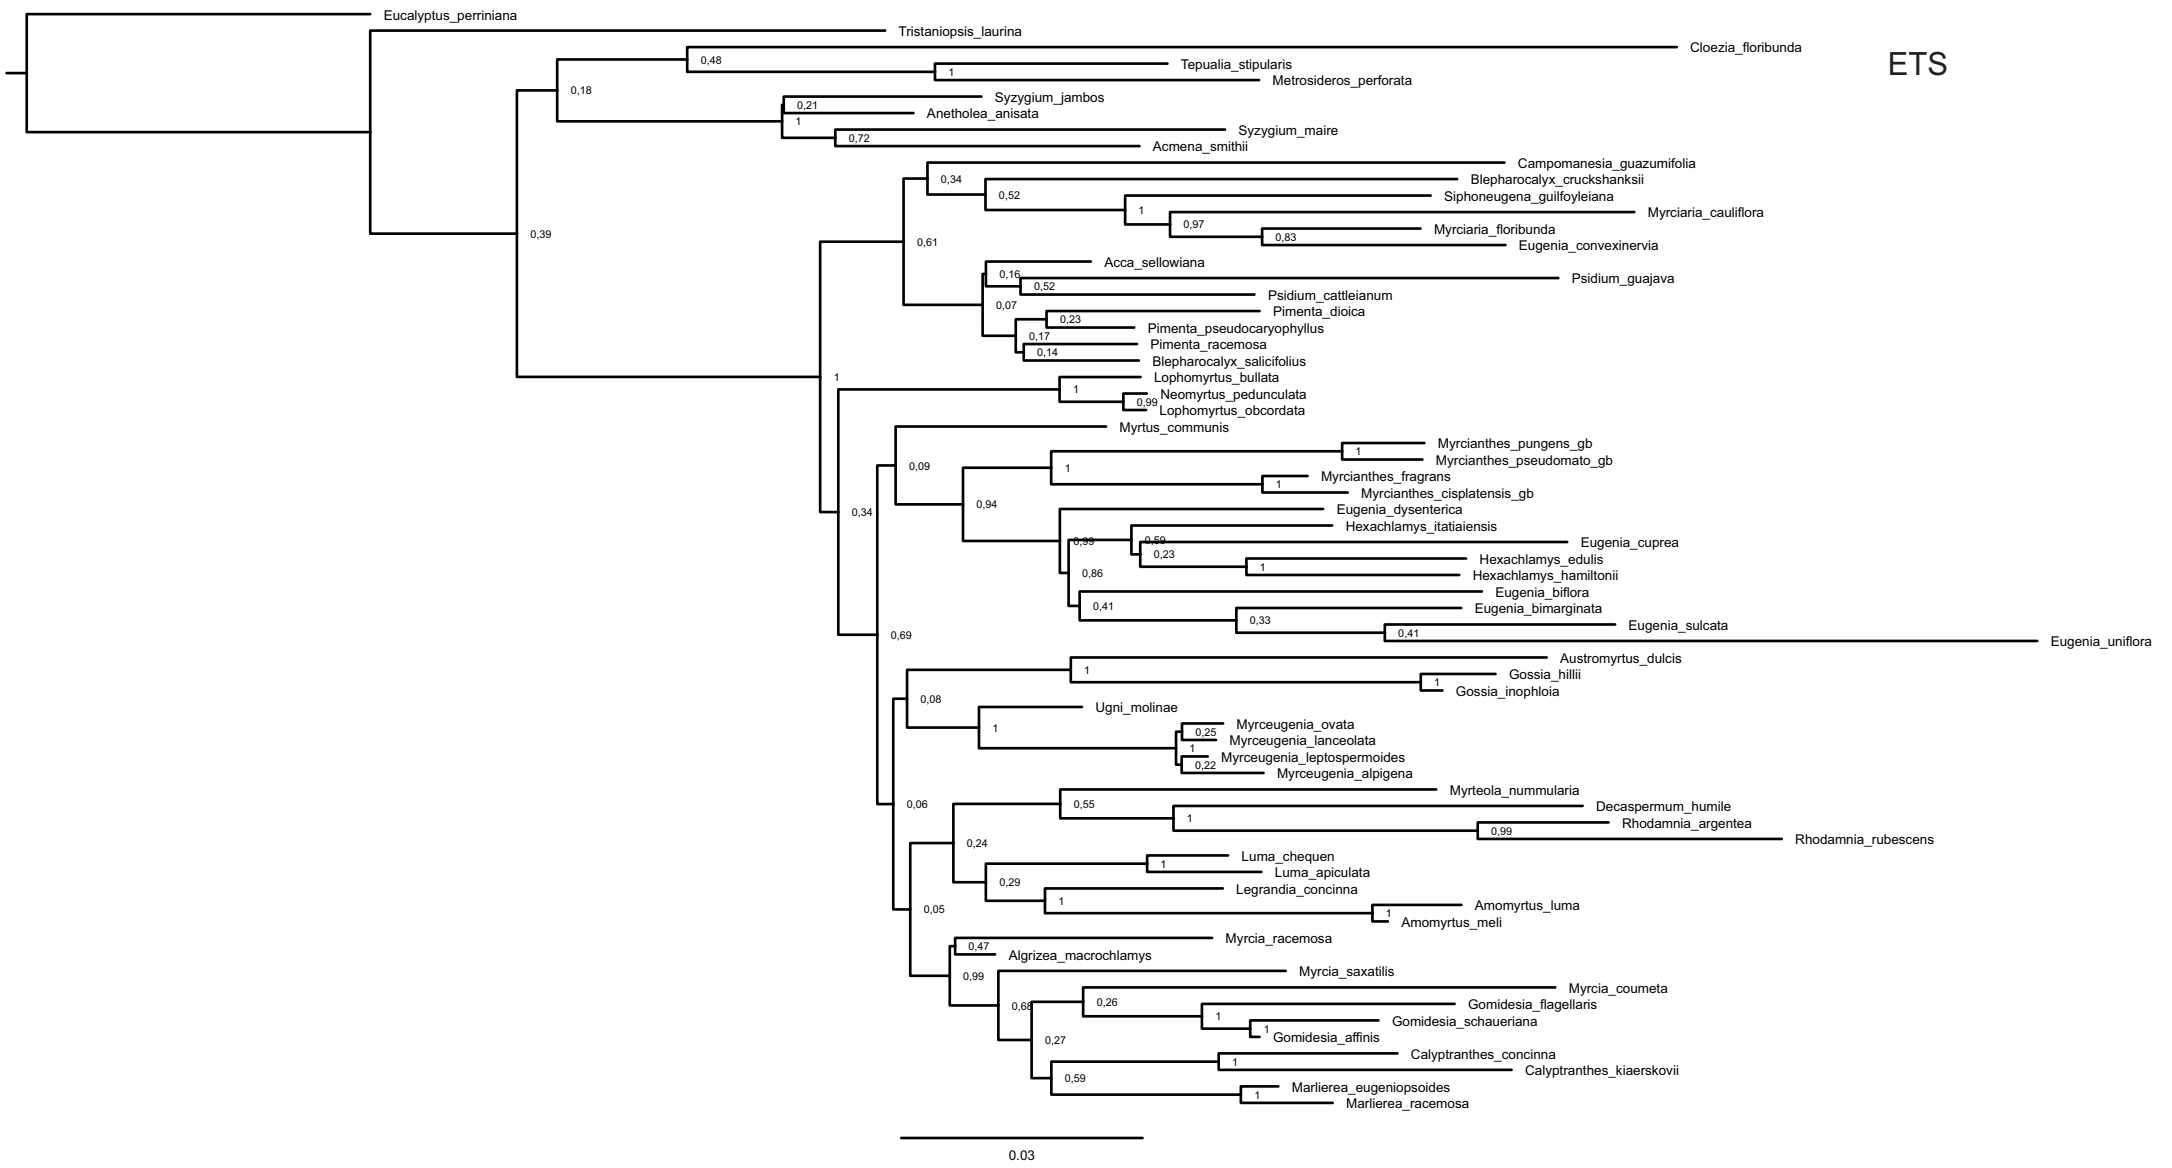

ETS

0.03
